# Supplementary material for: Diversification of the Alpine Chipmunk, Tamias alpinus, an alpine endemic of the Sierra Nevada, California
Source: PubMed Central journal article supplement (PMC4077034; doi:10.1186/1471-2148-14-34), 2014-02-23
Supplement: 1471-2148-14-34-S2.pdf [file 1471-2148-14-34-S2.pdf]

Table S4. ID/Catalogue numbers of all samples sequenced at cytochrome b. Summarized information includes location information, haplotype number, network group, clade and whether or not sample was included in microsatellite analysis. Samples from museum skins were not run with the microsatellites because only a subset of microsatellite (7) amplified the historical samples.

| Cat. No. | Species           | Location                                    | Latitude  | Longitude  | GeogGrp | Msat | Haplotype | Network Gp | Clade |
|----------|-------------------|---------------------------------------------|-----------|------------|---------|------|-----------|------------|-------|
| 14931    | <i>T. alpinus</i> | W slope Olancha Peak, Sierra Nevada         | 36.26623  | -118.11771 | T.alp_S | No   | Hap_16    | South1     | RED   |
| 14932    | <i>T. alpinus</i> | W slope Olancha Peak, Sierra Nevada         | 36.26623  | -118.11771 | T.alp_S | No   | Hap_17    | South1     | RED   |
| 14933    | <i>T. alpinus</i> | W slope Olancha Peak, Sierra Nevada         | 36.26623  | -118.11771 | T.alp_S | No   | Hap_18    | South1     | RED   |
| 224075   | <i>T. alpinus</i> | Muir Lake, Cottonwood Lakes Basin           | 36.49873  | -118.2077  | T.alp_S | Yes  | Hap_28    | South2     | RED   |
| 224076   | <i>T. alpinus</i> | Muir Lake, Cottonwood Lakes Basin           | 36.49873  | -118.2077  | T.alp_S | Yes  | Hap_29    | N/A        | BLACK |
| 224077   | <i>T. alpinus</i> | Muir Lake, Cottonwood Lakes Basin           | 36.49873  | -118.2077  | T.alp_S | Yes  | Hap_21    | South1     | RED   |
| 224078   | <i>T. alpinus</i> | Muir Lake, Cottonwood Lakes Basin           | 36.49873  | -118.2077  | T.alp_S | Yes  | Hap_21    | South1     | RED   |
| 14973    | <i>T. alpinus</i> | Cottonwood Lakes, Sierra Nevada Mts.        | 36.49835  | -118.21991 | T.alp_S | No   | Hap_17    | South1     | RED   |
| 14903    | <i>T. alpinus</i> | Cirque Peak, Sierra Nevada                  | 36.47629  | -118.23710 | T.alp_S | No   | Hap_13    | South1     | RED   |
| 14904    | <i>T. alpinus</i> | Cirque Peak, Sierra Nevada                  | 36.47629  | -118.23710 | T.alp_S | No   | Hap_13    | South1     | RED   |
| 14908    | <i>T. alpinus</i> | Whitney Meadow, Sierra Nevada               | 36.43413  | -118.26710 | T.alp_S | No   | Hap_14    | South1     | RED   |
| 14909    | <i>T. alpinus</i> | Whitney Meadow, Sierra Nevada               | 36.43413  | -118.26710 | T.alp_S | No   | Hap_15    | South2     | RED   |
| 206401   | <i>T. alpinus</i> | Siberian Outpost, Sequoia National Park     | 36.46957  | -118.2737  | T.alp_S | Yes  | Hap_22    | South1     | RED   |
| 206403   | <i>T. alpinus</i> | Siberian Outpost, Sequoia National Park     | 36.4685   | -118.2745  | T.alp_S | Yes  | Hap_24    | South1     | RED   |
| 206402   | <i>T. alpinus</i> | Siberian Outpost, Sequoia National Park     | 36.46895  | -118.2746  | T.alp_S | Yes  | Hap_23    | South2     | RED   |
| 206400   | <i>T. alpinus</i> | Siberian Outpost, Sequoia National Park     | 36.46829  | -118.2748  | T.alp_S | Yes  | Hap_21    | South1     | RED   |
| 17576    | <i>T. alpinus</i> | Kearsarge Pass, Onion Valley, Sierra Nevada | 36.77450  | -118.32419 | T.alp_S | No   | Hap_19    | South1     | RED   |
| 206398   | <i>T. alpinus</i> | Kearsarge Lakes, Kings Canyon National Park | 36.77289  | -118.379   | T.alp_S | Yes  | Hap_20    | N/A        | GREEN |
| 206397   | <i>T. alpinus</i> | Kearsarge Lakes, Kings Canyon National Park | 36.7724   | -118.3834  | T.alp_S | Yes  | Hap_21    | South1     | RED   |
| 206396   | <i>T. alpinus</i> | Kearsarge Lakes, Kings Canyon National Park | 36.7713   | -118.3857  | T.alp_S | Yes  | Hap_20    | N/A        | GREEN |
| 206399   | <i>T. alpinus</i> | Kearsarge Lakes, Kings Canyon National Park | 36.77128  | -118.386   | T.alp_S | Yes  | Hap_18    | South1     | RED   |
| 224480   | <i>T. alpinus</i> | Bullfrog Lake, Kings Canyon National Park   | 36.769664 | -118.4018  | T.alp_S | Yes  | Hap_20    | N/A        | GREEN |
| 224481   | <i>T. alpinus</i> | Bullfrog Lake, Kings Canyon National Park   | 36.769664 | -118.4018  | T.alp_S | Yes  | Hap_21    | South1     | RED   |
| 224482   | <i>T. alpinus</i> | Bullfrog Lake, Kings Canyon National Park   | 36.769664 | -118.4018  | T.alp_S | Yes  | Hap_25    | N/A        | GREEN |
| 224483   | <i>T. alpinus</i> | Bullfrog Lake, Kings Canyon National Park   | 36.773289 | -118.4028  | T.alp_S | Yes  | Hap_26    | -          | RED   |
| 224484   | <i>T. alpinus</i> | Bullfrog Lake, Kings Canyon National Park   | 36.773289 | -118.4028  | T.alp_S | Yes  | Hap_27*   | -          | RED   |
| 222200   | <i>T. alpinus</i> | Mono Pass                                   | 37.85461  | -119.2136  | T.alp-N | Yes  | Hap_1     | North2     | RED   |
| 222203   | <i>T. alpinus</i> | Mono Pass                                   | 37.85461  | -119.2136  | T.alp-N | Yes  | Hap_7*    | -          | RED   |
| JLP24301 | <i>T. alpinus</i> | Mono Pass                                   | 37.85461  | -119.2136  | T.alp-N | Yes  | Hap_1     | North2     | RED   |
| JLP24302 | <i>T. alpinus</i> | Mono Pass                                   | 37.85461  | -119.2136  | T.alp-N | Yes  | Hap_1     | North2     | RED   |
| JLP24310 | <i>T. alpinus</i> | Mono Pass                                   | 37.85461  | -119.2136  | T.alp-N | Yes  | Hap_1     | North2     | RED   |
| T174     | <i>T. alpinus</i> | Mono Pass                                   | 37.85461  | -119.2136  | T.alp-N | Yes  | Hap_1     | North2     | RED   |
| T175     | <i>T. alpinus</i> | Mono Pass                                   | 37.85461  | -119.2136  | T.alp-N | Yes  | Hap_1     | North2     | RED   |
| T180     | <i>T. alpinus</i> | Mono Pass                                   | 37.85461  | -119.2136  | T.alp-N | Yes  | Hap_1     | North2     | RED   |

| Cat. No. | Species           | Location                        | Latitude | Longitude  | GeogGrp | Msat | Haplotype | Network Gp | Clade |
|----------|-------------------|---------------------------------|----------|------------|---------|------|-----------|------------|-------|
| T184     | <i>T. alpinus</i> | Mono Pass                       | 37.85461 | -119.2136  | T.alp-N | Yes  | Hap_1     | North2     | RED   |
| T191     | <i>T. alpinus</i> | Mono Pass                       | 37.85461 | -119.2136  | T.alp-N | Yes  | Hap_3*    | North1     | BLUE  |
| T195     | <i>T. alpinus</i> | Mono Pass                       | 37.85461 | -119.2136  | T.alp-N | Yes  | Hap_1     | North2     | RED   |
| T196a    | <i>T. alpinus</i> | Mono Pass                       | 37.85461 | -119.2136  | T.alp-N | Yes  | Hap_1     | North2     | RED   |
| T196b    | <i>T. alpinus</i> | Mono Pass                       | 37.85461 | -119.2136  | T.alp-N | Yes  | Hap_1     | North2     | RED   |
| T197a    | <i>T. alpinus</i> | Mono Pass                       | 37.85461 | -119.2136  | T.alp-N | Yes  | Hap_1     | North2     | RED   |
| T197b    | <i>T. alpinus</i> | Mono Pass                       | 37.85461 | -119.2136  | T.alp-N | Yes  | Hap_1     | North2     | RED   |
| T198     | <i>T. alpinus</i> | Mono Pass                       | 37.85461 | -119.2136  | T.alp-N | Yes  | Hap_3*    | North1     | BLUE  |
| T38      | <i>T. alpinus</i> | Mono Pass                       | 37.85461 | -119.2136  | T.alp-N | Yes  | Hap_1     | North2     | RED   |
| EMR91    | <i>T. alpinus</i> | Head of Ellery Lake             | 37.93635 | -119.22753 | T.alp-N | Yes  | Hap_1     | North2     | RED   |
| EMR90    | <i>T. alpinus</i> | Head of Ellery Lake             | 37.93557 | -119.22878 | T.alp-N | Yes  | Hap_3*    | North1     | BLUE  |
| 23335    | <i>T. alpinus</i> | Warren Fork of Lee Vining Creek | 37.96006 | -119.23465 | T.alp-N | No   | Hap_10    | North2     | RED   |
| 23334    | <i>T. alpinus</i> | near Ellery Lake, Tioga Rd.     | 37.93806 | -119.23593 | T.alp-N | No   | Hap_3*    | North1     | BLUE  |
| 23338    | <i>T. alpinus</i> | near Tioga Rd.                  | 37.93248 | -119.24846 | T.alp-N | No   | Hap_11    | North1     | BLUE  |
| 217179   | <i>T. alpinus</i> | Upper Lyell Canyon, YNP         | 37.76458 | -119.2521  | T.alp-N | Yes  | Hap_1     | North2     | RED   |
| 217180   | <i>T. alpinus</i> | Upper Lyell Canyon, YNP         | 37.76458 | -119.2521  | T.alp-N | Yes  | Hap_1     | North2     | RED   |
| 217181   | <i>T. alpinus</i> | Upper Lyell Canyon, YNP         | 37.76458 | -119.2521  | T.alp-N | Yes  | Hap_1     | North2     | RED   |
| 217182   | <i>T. alpinus</i> | Upper Lyell Canyon, YNP         | 37.76458 | -119.2521  | T.alp-N | Yes  | Hap_2     | North1     | BLUE  |
| 217183   | <i>T. alpinus</i> | Upper Lyell Canyon, YNP         | 37.76458 | -119.2521  | T.alp-N | Yes  | Hap_1     | North2     | RED   |
| 217184   | <i>T. alpinus</i> | Upper Lyell Canyon, YNP         | 37.76458 | -119.2521  | T.alp-N | Yes  | Hap_1     | North2     | RED   |
| 217185   | <i>T. alpinus</i> | Upper Lyell Canyon, YNP         | 37.76458 | -119.2521  | T.alp-N | Yes  | Hap_1     | North2     | RED   |
| EMR37    | <i>T. alpinus</i> | Upper Lyell Canyon, YNP         | 37.76458 | -119.25213 | T.alp-N | Yes  | Hap_3*    | North1     | BLUE  |
| EMR32    | <i>T. alpinus</i> | Upper Lyell Canyon, YNP         | 37.76595 | -119.25273 | T.alp-N | Yes  | Hap_2     | North1     | BLUE  |
| EMR38    | <i>T. alpinus</i> | Upper Lyell Canyon, YNP         | 37.76612 | -119.25287 | T.alp-N | Yes  | Hap_4     | North1     | RED   |
| EMR33    | <i>T. alpinus</i> | Upper Lyell Canyon, YNP         | 37.76405 | -119.25298 | T.alp-N | Yes  | Hap_1     | North2     | RED   |
| 216270   | <i>T. alpinus</i> | Upper Lyell Canyon, YNP         | 37.76807 | -119.2551  | T.alp-N | Yes  | Hap_3*    | North1     | BLUE  |
| 217178   | <i>T. alpinus</i> | Upper Lyell Canyon, YNP         | 37.76807 | -119.2551  | T.alp-N | Yes  | Hap_1     | North2     | RED   |
| 217186   | <i>T. alpinus</i> | Upper Lyell Canyon, YNP         | 37.76807 | -119.2551  | T.alp-N | Yes  | Hap_1     | North2     | RED   |
| EMR36    | <i>T. alpinus</i> | Upper Lyell Canyon, YNP         | 37.76417 | -119.25540 | T.alp-N | Yes  | Hap_3*    | North1     | BLUE  |
| EMR35    | <i>T. alpinus</i> | Upper Lyell Canyon, YNP         | 37.76415 | -119.25542 | T.alp-N | Yes  | Hap_1     | North2     | RED   |
| EMR31    | <i>T. alpinus</i> | Upper Lyell Canyon, YNP         | 37.76397 | -119.25582 | T.alp-N | Yes  | Hap_1     | North2     | RED   |
| EMR34    | <i>T. alpinus</i> | Upper Lyell Canyon, YNP         | 37.76390 | -119.25598 | T.alp-N | Yes  | Hap_1     | North2     | RED   |
| EMR29    | <i>T. alpinus</i> | Upper Lyell Canyon, YNP         | 37.76353 | -119.25625 | T.alp-N | Yes  | Hap_1     | North2     | RED   |
| EMR30    | <i>T. alpinus</i> | Upper Lyell Canyon, YNP         | 37.76353 | -119.25625 | T.alp-N | Yes  | Hap_1     | North2     | RED   |
| EMR50    | <i>T. alpinus</i> | Upper Lyell Canyon, YNP         | 37.76330 | -119.25773 | T.alp-N | Yes  | Hap_3*    | North1     | BLUE  |
| EMR39    | <i>T. alpinus</i> | Upper Lyell Canyon, YNP         | 37.76228 | -119.25847 | T.alp-N | Yes  | Hap_3*    | North1     | BLUE  |
| 217188   | <i>T. alpinus</i> | Upper Lyell Canyon, YNP         | 37.75675 | -119.2586  | T.alp-N | Yes  | Hap_8     | North2     | RED   |
| EMR48    | <i>T. alpinus</i> | Upper Lyell Canyon, YNP         | 37.76150 | -119.25870 | T.alp-N | Yes  | Hap_1     | North2     | RED   |
| EMR51    | <i>T. alpinus</i> | Upper Lyell Canyon, YNP         | 37.76155 | -119.25885 | T.alp-N | Yes  | Hap_1     | North2     | RED   |
| EMR41    | <i>T. alpinus</i> | Upper Lyell Canyon, YNP         | 37.76072 | -119.25923 | T.alp-N | Yes  | Hap_3*    | North1     | BLUE  |
| EMR45    | <i>T. alpinus</i> | Upper Lyell Canyon, YNP         | 37.76072 | -119.25923 | T.alp-N | Yes  | Hap_3*    | North1     | BLUE  |

| Cat. No. | Species           | Location                                 | Latitude | Longitude  | GeogGrp | Msat | Haplotype | Network Gp | Clade |
|----------|-------------------|------------------------------------------|----------|------------|---------|------|-----------|------------|-------|
| EMR46    | <i>T. alpinus</i> | Upper Lyell Canyon, YNP                  | 37.76072 | -119.25923 | T.alp-N | Yes  | Hap_1     | North2     | RED   |
| 217189   | <i>T. alpinus</i> | Upper Lyell Canyon, YNP                  | 37.76358 | -119.26    | T.alp-N | Yes  | Hap_1     | North2     | RED   |
| EMR72    | <i>T. alpinus</i> | Gaylor Lakes, YNP                        | 37.91122 | -119.26625 | T.alp-N | Yes  | Hap_3*    | North1     | BLUE  |
| EMR85    | <i>T. alpinus</i> | Gaylor Lakes, YNP                        | 37.91062 | -119.26761 | T.alp-N | Yes  | Hap_3*    | North1     | BLUE  |
| EMR91b   | <i>T. alpinus</i> | Gaylor Lakes, YNP                        | 37.91062 | -119.26761 | T.alp-N | Yes  | Hap_3*    | North1     | BLUE  |
| EMR82    | <i>T. alpinus</i> | Gaylor Lakes, YNP                        | 37.91008 | -119.26835 | T.alp-N | Yes  | Hap_1     | North2     | RED   |
| EMR76    | <i>T. alpinus</i> | Gaylor Lakes, YNP                        | 37.90986 | -119.26875 | T.alp-N | Yes  | Hap_1     | North2     | RED   |
| EMR81    | <i>T. alpinus</i> | Gaylor Lakes, YNP                        | 37.90912 | -119.26948 | T.alp-N | Yes  | Hap_1     | North2     | RED   |
| 207203   | <i>T. alpinus</i> | Evelyn Lake, YNP                         | 37.80485 | -119.3276  | T.alp-N | Yes  | Hap_6*    | -          | RED   |
| 207204   | <i>T. alpinus</i> | Evelyn Lake, YNP                         | 37.80485 | -119.3276  | T.alp-N | Yes  | Hap_6*    | -          | RED   |
| 207205   | <i>T. alpinus</i> | Evelyn Lake, YNP                         | 37.80485 | -119.3276  | T.alp-N | Yes  | Hap_6*    | -          | RED   |
| 207206   | <i>T. alpinus</i> | Evelyn Lake, YNP                         | 37.80485 | -119.3276  | T.alp-N | Yes  | Hap_3*    | North1     | BLUE  |
| 207207   | <i>T. alpinus</i> | Evelyn Lake, YNP                         | 37.80485 | -119.3276  | T.alp-N | Yes  | Hap_6*    | -          | RED   |
| 207199   | <i>T. alpinus</i> | E end Fletcher Lake, YNP                 | 37.79778 | -119.3362  | T.alp-N | Yes  | Hap_3*    | North1     | BLUE  |
| 216271   | <i>T. alpinus</i> | Upper Return Creek, Virginia Canyon, YNP | 38.06129 | -119.339   | T.alp-N | Yes  | Hap_3*    | North1     | BLUE  |
| 216272   | <i>T. alpinus</i> | Upper Return Creek, Virginia Canyon, YNP | 38.06129 | -119.339   | T.alp-N | Yes  | Hap_7*    | -          | RED   |
| 222201   | <i>T. alpinus</i> | Middle Young Lake, YNP                   | 37.93876 | -119.3405  | T.alp-N | Yes  | Hap_3*    | North1     | BLUE  |
| 222202   | <i>T. alpinus</i> | Middle Young Lake, YNP                   | 37.93876 | -119.3405  | T.alp-N | Yes  | Hap_3*    | North1     | BLUE  |
| 222206   | <i>T. alpinus</i> | Middle Young Lake, YNP                   | 37.93876 | -119.3405  | T.alp-N | Yes  | Hap_3*    | North1     | BLUE  |
| JLP24337 | <i>T. alpinus</i> | Middle Young Lake, YNP                   | 37.93876 | -119.3405  | T.alp-N | Yes  | Hap_3*    | North1     | BLUE  |
| JLP24338 | <i>T. alpinus</i> | Middle Young Lake, YNP                   | 37.93876 | -119.3405  | T.alp-N | Yes  | Hap_3*    | North1     | BLUE  |
| JLP24345 | <i>T. alpinus</i> | Middle Young Lake, YNP                   | 37.93876 | -119.3405  | T.alp-N | Yes  | Hap_3*    | North1     | BLUE  |
| JLP24365 | <i>T. alpinus</i> | Middle Young Lake, YNP                   | 37.93876 | -119.3405  | T.alp-N | Yes  | Hap_3*    | North1     | BLUE  |
| JLP24373 | <i>T. alpinus</i> | Middle Young Lake, YNP                   | 37.93876 | -119.3405  | T.alp-N | Yes  | Hap_9     | North1     | BLUE  |
| JLP24374 | <i>T. alpinus</i> | Middle Young Lake, YNP                   | 37.93876 | -119.3405  | T.alp-N | Yes  | Hap_3*    | North1     | BLUE  |
| 207209   | <i>T. alpinus</i> | Vogelsang Lake, YNP                      | 37.78769 | -119.3469  | T.alp-N | Yes  | Hap_6*    | -          | RED   |
| 207210   | <i>T. alpinus</i> | Fletcher Lake, YNP                       | 37.78769 | -119.3469  | T.alp-N | Yes  | Hap_6*    | -          | RED   |
| 207211   | <i>T. alpinus</i> | Outlet Creek, Vogelsang Lake, YNP        | 37.78769 | -119.3469  | T.alp-N | Yes  | Hap_6*    | -          | RED   |
| 219990   | <i>T. alpinus</i> | Upper Cathedral Lake, YNP                | 37.84117 | -119.4121  | T.alp-N | Yes  | Hap_3*    | North1     | BLUE  |
| 219991   | <i>T. alpinus</i> | Upper Cathedral Lake, YNP                | 37.84117 | -119.4121  | T.alp-N | Yes  | Hap_1     | North2     | RED   |
| 219992   | <i>T. alpinus</i> | Upper Cathedral Lake, YNP                | 37.84117 | -119.4121  | T.alp-N | Yes  | Hap_1     | North2     | RED   |
| 219993   | <i>T. alpinus</i> | Upper Cathedral Lake, YNP                | 37.84117 | -119.4121  | T.alp-N | Yes  | Hap_1     | North2     | RED   |
| 219994   | <i>T. alpinus</i> | Upper Cathedral Lake, YNP                | 37.84117 | -119.4121  | T.alp-N | Yes  | Hap_3*    | North1     | BLUE  |
| 219995   | <i>T. alpinus</i> | Upper Cathedral Lake, YNP                | 37.84117 | -119.4121  | T.alp-N | Yes  | Hap_1     | North2     | RED   |
| 219998   | <i>T. alpinus</i> | Lower Ottaway Lake, YNP                  | 37.64537 | -119.4198  | T.alp-N | Yes  | Hap_1     | North2     | RED   |
| 220000   | <i>T. alpinus</i> | Lower Ottaway Lake, YNP                  | 37.64537 | -119.4198  | T.alp-N | Yes  | Hap_1     | North2     | RED   |
| 220001   | <i>T. alpinus</i> | Lower Ottaway Lake, YNP                  | 37.64537 | -119.4198  | T.alp-N | Yes  | Hap_1     | North2     | RED   |
| 220003   | <i>T. alpinus</i> | Lower Ottaway Lake, YNP                  | 37.64537 | -119.4198  | T.alp-N | Yes  | Hap_1     | North2     | RED   |
| 220004   | <i>T. alpinus</i> | Lower Ottaway Lake, YNP                  | 37.64537 | -119.4198  | T.alp-N | Yes  | Hap_1     | North2     | RED   |
| 220005   | <i>T. alpinus</i> | Lower Ottaway Lake, YNP                  | 37.64537 | -119.4198  | T.alp-N | Yes  | Hap_1     | North2     | RED   |
| 220006   | <i>T. alpinus</i> | Lower Ottaway Lake, YNP                  | 37.64537 | -119.4198  | T.alp-N | Yes  | Hap_1     | North2     | RED   |

| Cat. No. | Species           | Location                                                | Latitude  | Longitude  | GeogGrp   | Msat | Haplotype | Network Gp | Clade |
|----------|-------------------|---------------------------------------------------------|-----------|------------|-----------|------|-----------|------------|-------|
| 216690   | <i>T. alpinus</i> | Kerrick Meadow, YNP                                     | 38.11129  | -119.4818  | T.alp-N   | Yes  | Hap_3*    | North1     | BLUE  |
| EMR69    | <i>T. alpinus</i> | Mt. Hoffman; Northwest of May Lake, YNP                 | 37.85449  | -119.49239 | T.alp-N   | Yes  | Hap_3*    | North1     | BLUE  |
| EMR66    | <i>T. alpinus</i> | Mt. Hoffman; Northwest of May Lake, YNP                 | 37.85478  | -119.49276 | T.alp-N   | Yes  | Hap_3*    | North1     | BLUE  |
| EMR71    | <i>T. alpinus</i> | Mt. Hoffman; Northwest of May Lake, YNP                 | 37.85548  | -119.49289 | T.alp-N   | Yes  | Hap_3*    | North1     | BLUE  |
| 23344    | <i>T. alpinus</i> | Ten Lakes Trail above Ten Lakes, YNP                    | 37.90135  | -119.49807 | T.alp-N   | No   | Hap_10    | North2     | RED   |
| 23345    | <i>T. alpinus</i> | ridge near Ten Lakes, YNP                               | 37.90135  | -119.49807 | T.alp-N   | No   | Hap_12    | -          | RED   |
| EMR62    | <i>T. alpinus</i> | Ten Lakes Pass, YNP                                     | 37.90510  | -119.53470 | T.alp-N   | Yes  | Hap_3*    | North1     | BLUE  |
| EMR52    | <i>T. alpinus</i> | Ten Lakes Pass, YNP                                     | 37.90290  | -119.53505 | T.alp-N   | Yes  | Hap_3*    | North1     | BLUE  |
| EMR53    | <i>T. alpinus</i> | Ten Lakes Pass, YNP                                     | 37.90290  | -119.53505 | T.alp-N   | Yes  | Hap_5     | North1     | BLUE  |
| 216306   | <i>T. minimus</i> | Badger Flat                                             | 36.97099  | -118.0954  | T.min -Wh | Yes  | Hap_27*   | -          | RED   |
| 216307   | <i>T. minimus</i> | Badger Flat                                             | 36.97099  | -118.0954  | T.min -Wh | Yes  | Hap_27*   | -          | RED   |
| 216308   | <i>T. minimus</i> | Badger Flat                                             | 36.97099  | -118.0954  | T.min -Wh | Yes  | Hap_27*   | -          | RED   |
| 216309   | <i>T. minimus</i> | Badger Flat                                             | 36.97099  | -118.0954  | T.min -Wh | Yes  | Hap_27*   | -          | RED   |
| 14976    | <i>T. minimus</i> | Little Brush Meadow, Olancha Peak, Sierra Nevada        | 36.26623  | -118.11771 | T.min-S   | Yes  | Hap_41    | South2     | RED   |
| 224487   | <i>T. minimus</i> | Little Brush Meadow, Olancha Peak, Inyo National Forest | 36.25424  | -118.1323  | T.min-S   | Yes  | Hap_30    | South2     | RED   |
| 224485   | <i>T. minimus</i> | Little Brush Meadow, Olancha Peak, Inyo National Forest | 36.25278  | -118.1336  | T.min-S   | Yes  | Hap_30    | South2     | RED   |
| 224486   | <i>T. minimus</i> | Little Brush Meadow, Olancha Peak, Inyo National Forest | 36.25278  | -118.1336  | T.min-S   | Yes  | Hap_31    | South2     | RED   |
| 217106   | <i>T. minimus</i> | N. Fork Crooked Creek                                   | 37.50348  | -118.1476  | T.min-C   | Yes  | Hap_27*   | -          | RED   |
| 217107   | <i>T. minimus</i> | N. Fork Crooked Creek                                   | 37.50348  | -118.1476  | T.min-C   | Yes  | Hap_27*   | -          | RED   |
| 217111   | <i>T. minimus</i> | N. Fork Crooked Creek                                   | 37.50348  | -118.1476  | T.min-C   | Yes  | Hap_27*   | -          | RED   |
| 217112   | <i>T. minimus</i> | N. Fork Crooked Creek                                   | 37.50348  | -118.1476  | T.min-C   | Yes  | Hap_27*   | -          | RED   |
| 217113   | <i>T. minimus</i> | N. Fork Crooked Creek                                   | 37.50348  | -118.1476  | T.min-C   | Yes  | Hap_27*   | -          | RED   |
| 217114   | <i>T. minimus</i> | N. Fork Crooked Creek                                   | 37.50348  | -118.1476  | T.min-C   | Yes  | Hap_27*   | -          | RED   |
| 217116   | <i>T. minimus</i> | N. Fork Crooked Creek                                   | 37.50348  | -118.1476  | T.min-C   | Yes  | Hap_27*   | -          | RED   |
| 217117   | <i>T. minimus</i> | N. Fork Crooked Creek                                   | 37.50348  | -118.1476  | T.min-C   | Yes  | Hap_27*   | -          | RED   |
| 217118   | <i>T. minimus</i> | N. Fork Crooked Creek                                   | 37.50348  | -118.1476  | T.min-C   | Yes  | Hap_44    | -          | RED   |
| 219907   | <i>T. minimus</i> | south fork Cottonwood Creek, White Mts.                 | 37.53101  | -118.1651  | T.min-C   | Yes  | Hap_27*   | -          | RED   |
| 219908   | <i>T. minimus</i> | south fork Cottonwood Creek, White Mts.                 | 37.53101  | -118.1651  | T.min-C   | Yes  | Hap_44    | -          | RED   |
| 219909   | <i>T. minimus</i> | south fork Cottonwood Creek, White Mts.                 | 37.53101  | -118.1651  | T.min-C   | Yes  | Hap_27*   | -          | RED   |
| 219910   | <i>T. minimus</i> | south fork Cottonwood Creek, White Mts.                 | 37.53101  | -118.1651  | T.min-C   | Yes  | Hap_27*   | -          | RED   |
| 219911   | <i>T. minimus</i> | south fork Cottonwood Creek, White Mts.                 | 37.53101  | -118.1651  | T.min-C   | Yes  | Hap_45    | North1     | BLUE  |
| 222659   | <i>T. minimus</i> | Broder/Monache Meadow                                   | 36.159921 | -118.1874  | T.min-S   | Yes  | Hap_36    | South2     | RED   |
| 222660   | <i>T. minimus</i> | Broder/Monache Meadow                                   | 36.159921 | -118.1874  | T.min-S   | Yes  | Hap_36    | South2     | RED   |
| 222661   | <i>T. minimus</i> | Broder/Monache Meadow                                   | 36.162908 | -118.1914  | T.min-S   | Yes  | Hap_37    | South2     | RED   |
| 222662   | <i>T. minimus</i> | Broder/Monache Meadow                                   | 36.162908 | -118.1914  | T.min-S   | Yes  | Hap_36    | South2     | RED   |
| 222663   | <i>T. minimus</i> | Broder/Monache Meadow                                   | 36.162908 | -118.1914  | T.min-S   | Yes  | Hap_37    | South2     | RED   |
| 222664   | <i>T. minimus</i> | Broder/Monache Meadow                                   | 36.162908 | -118.1914  | T.min-S   | Yes  | Hap_37    | South2     | RED   |
| 222665   | <i>T. minimus</i> | Broder/Monache Meadow                                   | 36.162908 | -118.1914  | T.min-S   | Yes  | Hap_37    | South2     | RED   |
| 222666   | <i>T. minimus</i> | Broder/Monache Meadow                                   | 36.175368 | -118.2053  | T.min-S   | Yes  | Hap_37    | South2     | RED   |
| 222667   | <i>T. minimus</i> | Broder/Monache Meadow                                   | 36.175368 | -118.2053  | T.min-S   | Yes  | Hap_37    | South2     | RED   |
| 222668   | <i>T. minimus</i> | Broder/Monache Meadow                                   | 36.175368 | -118.2053  | T.min-S   | Yes  | Hap_38    | South2     | RED   |

| Cat. No. | Species           | Location                                                | Latitude  | Longitude | GeogGrp   | Msat | Haplotype | Network Gp | Clade |
|----------|-------------------|---------------------------------------------------------|-----------|-----------|-----------|------|-----------|------------|-------|
| 222669   | <i>T. minimus</i> | Broder/Monache Meadow                                   | 36.175368 | -118.2053 | T.min-S   | Yes  | Hap_37    | South2     | RED   |
| 222670   | <i>T. minimus</i> | Broder/Monache Meadow                                   | 36.175368 | -118.2053 | T.min-S   | Yes  | Hap_37    | South2     | RED   |
| 222671   | <i>T. minimus</i> | Broder/Monache Meadow                                   | 36.175368 | -118.2053 | T.min-S   | Yes  | Hap_37    | South2     | RED   |
| 222672   | <i>T. minimus</i> | Broder/Monache Meadow                                   | 36.175368 | -118.2053 | T.min-S   | Yes  | Hap_36    | South2     | RED   |
| 222673   | <i>T. minimus</i> | Broder/Monache Meadow                                   | 36.175368 | -118.2053 | T.min-S   | Yes  | Hap_37    | South2     | RED   |
| JAC399   | <i>T. minimus</i> | Broder/Monache Meadow                                   | 36.175368 | -118.2053 | T.min-S   | Yes  | Hap_37    | South2     | RED   |
| JAC401   | <i>T. minimus</i> | Broder/Monache Meadow                                   | 36.175368 | -118.2053 | T.min-S   | Yes  | Hap_36    | South2     | RED   |
| JAC403   | <i>T. minimus</i> | Broder/Monache Meadow                                   | 36.175368 | -118.2053 | T.min-S   | Yes  | Hap_37    | South2     | RED   |
| JAC404   | <i>T. minimus</i> | Broder/Monache Meadow                                   | 36.175368 | -118.2053 | T.min-S   | Yes  | Hap_37    | South2     | RED   |
| JAC405   | <i>T. minimus</i> | Broder/Monache Meadow                                   | 36.175368 | -118.2053 | T.min-S   | Yes  | Hap_38    | South2     | RED   |
| JAC412   | <i>T. minimus</i> | Broder/Monache Meadow                                   | 36.175368 | -118.2053 | T.min-S   | Yes  | Hap_37    | South2     | RED   |
| JAC413   | <i>T. minimus</i> | Broder/Monache Meadow                                   | 36.175368 | -118.2053 | T.min-S   | Yes  | Hap_36    | South2     | RED   |
| JAC415   | <i>T. minimus</i> | Broder/Monache Meadow                                   | 36.175368 | -118.2053 | T.min-S   | Yes  | Hap_37    | South2     | RED   |
| JAC417   | <i>T. minimus</i> | Broder/Monache Meadow                                   | 36.175368 | -118.2053 | T.min-S   | Yes  | Hap_36    | South2     | RED   |
| JAC418   | <i>T. minimus</i> | Broder/Monache Meadow                                   | 36.175368 | -118.2053 | T.min-S   | Yes  | Hap_36    | South2     | RED   |
| KCR487   | <i>T. minimus</i> | Broder/Monache Meadow                                   | 36.175368 | -118.2053 | T.min-S   | Yes  | Hap_37    | South2     | RED   |
| 217271   | <i>T. minimus</i> | Silver Canyon                                           | 37.40205  | -118.2249 | T.min-C   | Yes  | Hap_27*   | -          | RED   |
| 221244   | <i>T. minimus</i> | below Big Pine Creek Campground, Sierra Nevada, Inyo Co | 37.12927  | -118.4059 | T.min -Wh | Yes  | Hap_47    | -          | RED   |
| 221274   | <i>T. minimus</i> | Wier Lake, Sierra Nevada, Inyo Co.                      | 37.17597  | -118.563  | T.min -Wh | Yes  | Hap_27*   | -          | RED   |
| 221275   | <i>T. minimus</i> | Wier Lake, Sierra Nevada, Inyo Co.                      | 37.17597  | -118.563  | T.min -Wh | Yes  | Hap_27*   | -          | RED   |
| 221260   | <i>T. minimus</i> | South Lake, Sierra Nevada, Inyo Co.                     | 37.17082  | -118.5656 | T.min -Wh | Yes  | Hap_27*   | -          | RED   |
| 221263   | <i>T. minimus</i> | South Lake, Sierra Nevada, Inyo Co.                     | 37.17082  | -118.5656 | T.min -Wh | Yes  | Hap_46    | -          | RED   |
| 221266   | <i>T. minimus</i> | South Lake, Sierra Nevada, Inyo Co.                     | 37.17082  | -118.5656 | T.min -Wh | Yes  | Hap_47    | -          | RED   |
| 221270   | <i>T. minimus</i> | South Lake, Sierra Nevada, Inyo Co.                     | 37.17082  | -118.5656 | T.min -Wh | Yes  | Hap_47    | -          | RED   |
| 221276   | <i>T. minimus</i> | south end Adobe Valley, Mono Co.                        | 37.792    | -118.5675 | T.min-N   | Yes  | Hap_48    | -          | RED   |
| 221277   | <i>T. minimus</i> | south end Adobe Valley, Mono Co.                        | 37.792    | -118.5675 | T.min-N   | Yes  | Hap_33    | North1     | BLUE  |
| 221278   | <i>T. minimus</i> | south end Adobe Valley, Mono Co.                        | 37.792    | -118.5675 | T.min-N   | Yes  | Hap_34    | North1     | BLUE  |
| 221247   | <i>T. minimus</i> | South Fork Bishop Creek, Sierra Nevada, Inyo Co.        | 37.20996  | -118.5691 | T.min -Wh | Yes  | Hap_27*   | -          | RED   |
| 221249   | <i>T. minimus</i> | South Fork Bishop Creek, Sierra Nevada, Inyo Co.        | 37.20996  | -118.5691 | T.min -Wh | Yes  | Hap_27*   | -          | RED   |
| 221251   | <i>T. minimus</i> | South Fork Bishop Creek, Sierra Nevada, Inyo Co.        | 37.20996  | -118.5691 | T.min -Wh | Yes  | Hap_27*   | -          | RED   |
| 221252   | <i>T. minimus</i> | South Fork Bishop Creek, Sierra Nevada, Inyo Co.        | 37.20996  | -118.5691 | T.min -Wh | Yes  | Hap_27*   | -          | RED   |
| 224150   | <i>T. minimus</i> | Pine Creek, Sierra Nevada                               | 37.36174  | -118.6902 | T.min -Wh | Yes  | Hap_27*   | -          | RED   |
| 224151   | <i>T. minimus</i> | Rock Creek, Sierra Nevada                               | 37.44426  | -118.7441 | T.min-C   | Yes  | Hap_27*   | -          | RED   |
| 224152   | <i>T. minimus</i> | Rock Creek, Sierra Nevada                               | 37.44426  | -118.7441 | T.min-C   | Yes  | Hap_27*   | -          | RED   |
| 224153   | <i>T. minimus</i> | Rock Creek, Sierra Nevada                               | 37.44426  | -118.7441 | T.min-C   | Yes  | Hap_27*   | -          | RED   |
| 208328   | <i>T. minimus</i> | Mono Mills                                              | 37.88811  | -118.9602 | T.min-N   | Yes  | Hap_40    | -          | RED   |
| 208329   | <i>T. minimus</i> | Mono Mills                                              | 37.88811  | -118.9602 | T.min-N   | Yes  | Hap_40    | -          | RED   |
| 208330   | <i>T. minimus</i> | Mono Mills                                              | 37.88811  | -118.9602 | T.min-N   | Yes  | Hap_33    | North1     | BLUE  |
| 208331   | <i>T. minimus</i> | Mono Mills                                              | 37.88811  | -118.9602 | T.min-N   | Yes  | Hap_40    | -          | RED   |
| 208332   | <i>T. minimus</i> | Mono Mills                                              | 37.88811  | -118.9602 | T.min-N   | Yes  | Hap_7*    | -          | RED   |
| 202384   | <i>T. minimus</i> | William's Butte                                         | 37.90753  | -119.1285 | T.min-N   | Yes  | Hap_33    | North1     | BLUE  |

| Cat. No. | Species           | Location                                | Latitude | Longitude | GeogGrp | Msat | Haplotype | Network Gp | Clade |
|----------|-------------------|-----------------------------------------|----------|-----------|---------|------|-----------|------------|-------|
| 219225   | <i>T. minimus</i> | William's Butte                         | 37.90753 | -119.1285 | T.min-N | Yes  | Hap_7*    | -          | RED   |
| 219226   | <i>T. minimus</i> | William's Butte                         | 37.90753 | -119.1285 | T.min-N | Yes  | Hap_42    | North1     | BLUE  |
| 219229   | <i>T. minimus</i> | William's Butte                         | 37.90753 | -119.1285 | T.min-N | Yes  | Hap_40    | -          | RED   |
| 219230   | <i>T. minimus</i> | William's Butte                         | 37.90753 | -119.1285 | T.min-N | Yes  | Hap_40    | -          | RED   |
| 219231   | <i>T. minimus</i> | William's Butte                         | 37.90753 | -119.1285 | T.min-N | Yes  | Hap_40    | -          | RED   |
| 219232   | <i>T. minimus</i> | William's Butte                         | 37.90753 | -119.1285 | T.min-N | Yes  | Hap_43    | North1     | BLUE  |
| 219233   | <i>T. minimus</i> | William's Butte                         | 37.90753 | -119.1285 | T.min-N | Yes  | Hap_40    | -          | RED   |
| 208551   | <i>T. minimus</i> | Bohler Creek                            | 37.90028 | -119.1298 | T.min-N | Yes  | Hap_6*    | -          | RED   |
| 208554   | <i>T. minimus</i> | Bohler Creek                            | 37.90028 | -119.1298 | T.min-N | Yes  | Hap_39    | South2     | RED   |
| 216299   | <i>T. minimus</i> | Bohler Creek                            | 37.90028 | -119.1298 | T.min-N | Yes  | Hap_33    | North1     | BLUE  |
| 216302   | <i>T. minimus</i> | Bohler Creek                            | 37.90028 | -119.1298 | T.min-N | Yes  | Hap_33    | North1     | BLUE  |
| 216303   | <i>T. minimus</i> | Bohler Creek                            | 37.90028 | -119.1298 | T.min-N | Yes  | Hap_33    | North1     | BLUE  |
| 216304   | <i>T. minimus</i> | Bohler Creek                            | 37.90028 | -119.1298 | T.min-N | Yes  | Hap_40    | -          | RED   |
| 221279   | <i>T. minimus</i> | Sawmill Canyon, Sierra Nevada, Mono Co. | 37.87559 | -119.1416 | T.min-N | Yes  | Hap_7*    | -          | RED   |
| 221280   | <i>T. minimus</i> | Sawmill Canyon, Sierra Nevada, Mono Co. | 37.87559 | -119.1416 | T.min-N | Yes  | Hap_40    | -          | RED   |
| 224154   | <i>T. minimus</i> | Swager Canyon, Sweetwater Mts.          | 38.38664 | -119.3446 | T.min-N | Yes  | Hap_3*    | North1     | BLUE  |
| 224140   | <i>T. minimus</i> | Sonora Pass                             | 38.32799 | -119.6372 | T.min-N | Yes  | Hap_32    | North1     | BLUE  |
| 224141   | <i>T. minimus</i> | Sonora Pass                             | 38.32799 | -119.6372 | T.min-N | Yes  | Hap_3*    | North1     | BLUE  |
| 224142   | <i>T. minimus</i> | Sonora Pass                             | 38.32799 | -119.6372 | T.min-N | Yes  | Hap_33    | North1     | BLUE  |
| 224143   | <i>T. minimus</i> | Sonora Pass                             | 38.32799 | -119.6372 | T.min-N | Yes  | Hap_32    | North1     | BLUE  |
| 224144   | <i>T. minimus</i> | Sonora Pass                             | 38.32799 | -119.6372 | T.min-N | Yes  | Hap_34    | North1     | BLUE  |
| 224145   | <i>T. minimus</i> | Sonora Pass                             | 38.32799 | -119.6372 | T.min-N | Yes  | Hap_32    | North1     | BLUE  |
| 224146   | <i>T. minimus</i> | Sonora Pass                             | 38.32799 | -119.6372 | T.min-N | Yes  | Hap_32    | North1     | BLUE  |
| 224147   | <i>T. minimus</i> | Sonora Pass                             | 38.32799 | -119.6372 | T.min-N | Yes  | Hap_32    | North1     | BLUE  |
| 224148   | <i>T. minimus</i> | Sonora Pass                             | 38.32799 | -119.6372 | T.min-N | Yes  | Hap_35    | North2     | RED   |
| 224149   | <i>T. minimus</i> | Sonora Pass                             | 38.32799 | -119.6372 | T.min-N | Yes  | Hap_32    | North1     | BLUE  |

\* haplotypes shared by both species

- no labeled network group; see Figure 4 in main text

N/A: haplotype more than 12 steps from network
