# Supplementary material for: Diversification of the Alpine Chipmunk, Tamias alpinus, an alpine endemic of the Sierra Nevada, California
Source: PubMed Central journal article supplement (PMC4077034; doi:10.1186/1471-2148-14-34), 2014-02-23
Supplement: 1471-2148-14-34-S3.pdf [file 1471-2148-14-34-S3.pdf]

## Supplementary Information

Recent speciation or reticulate evolution? Diversification of the Alpine Chipmunk, *Tamias alpinus*, an alpine endemic of the Sierra Nevada, California.

Emily M. Rubidge, James L. Patton and Craig Moritz

Table S2. Microsatellite primers used in analyses. *Tamias* specific cytochrome b primer sequences developed for museum skin specimens collected between 1911-1916; fragments were pieced together to make up 780bp product.

| Primer                                             | Sequence or Reference                                                         | Repeat Motif                                             | T <sub>a</sub> | Range   |
|----------------------------------------------------|-------------------------------------------------------------------------------|----------------------------------------------------------|----------------|---------|
| <b>Microsatellite Primers</b>                      |                                                                               |                                                          |                |         |
| Eu26                                               | Schulte-Hostedde et al 2000                                                   | (CA) <sub>20</sub>                                       | 55             | 140-200 |
| Eu37                                               | Schulte-Hostedde et al 2000                                                   | (GA) <sub>17</sub>                                       | 55             | 120-160 |
| Eu41                                               | Schulte-Hostedde et al 2000                                                   | (GT) <sub>16</sub>                                       | 55             | 120-160 |
| Eu86                                               | Schulte-Hostedde et al 2000                                                   | (AC) <sub>21</sub>                                       | 55             | 140-180 |
| Eu94                                               | Schulte-Hostedde et al 2000                                                   | (GT) <sub>14</sub>                                       | 51             | 90-140  |
| AC A2                                              | F 5'-ACA TCC ACT TTA CTC CCC A AC TC-3'<br>R 5' AGA GGC TAT GTC AGG AGG ATC'3 | (TTTC) <sub>9</sub> (TAC) <sub>8</sub>                   | 60             | 240-340 |
| AC B111                                            | F 5'- AAT ACC TAT CCA CCC ATC ATC -3'<br>R 5' TTC CCT CAA GCA GTC ATA AG -3'  | (GTCT) <sub>8</sub> (CT) <sub>6</sub> (CA) <sub>16</sub> | 57             | 230-245 |
| AC B12                                             | F 5'-AAA GGA ACC CTC TAC ACC AC -3'<br>R 5'-ACC GAA ACC ACT CAG AAC AG -3'    | (TG) <sub>11</sub> (TCTG) <sub>7</sub>                   | 58             | 250-300 |
| AC A101                                            | F 5' CTA GCC TCA GCC ACT CAG TG -3'<br>R 5'- GGT TCT ACC TTT GAG CCA CAC -3'  | (TAG) <sub>10</sub> (AAT) <sub>6</sub>                   | 58             | 120-190 |
| AC A108                                            | F 5'- CTG CTG CCT CTT CTT CTT C-3'<br>R 5' CCC ATA ATC CCA GTG ACT C- 3'      | (TAC) <sub>18</sub>                                      | 60             | 250-280 |
| AC C2                                              | F 5' CTG GGA ACA TAG TCT TTA GGC -3'<br>R 5' GTG AAT GGG CAG ATG ATT AG -3'   | (ATCC) <sub>8</sub>                                      | 60             | 110-160 |
| AC D115                                            | F 5' CTT TGC CAC ATC TGA CTT G -3'<br>R 5' ACT GGG TAG ACT GAG AAA TAC G -3'  | (TCTA) <sub>9</sub>                                      | 58             | 160-200 |
| AC D107                                            | F 5' TAA TTC AAC TCT GGG AAC ACT G -3'<br>R 5' GAA AGG AGC CTA AGC TGT TG -3' | (TATC) <sub>10</sub>                                     | 57             | 170-200 |
| AC C122                                            | F 5' CCC ATC CAT CTA TCT GTT CAT C-3'                                         | (TA) <sub>3</sub> TT(TCCA) <sub>9</sub>                  | 58             | 100-190 |
| <b><i>Tamias</i> specific cytochrome b primers</b> |                                                                               | <b>Product size (bp)</b>                                 |                |         |
| TAMH4F                                             | ATG ACA AAC ATC CGC AAA AC                                                    |                                                          |                |         |
| TAMH3R                                             | TCC GTT AGC GTG TAT GTA TCG                                                   | 239                                                      | 50             |         |
| TAMH5F                                             | CCG ATA CAT ACA CGC CAA CG                                                    |                                                          |                |         |
| TAMH2R                                             | TCC TCA TGG GAG AAC GTA GC                                                    | 171                                                      | 50             |         |
| TAMH6F                                             | GCT ACG TTC TCC CAT GAG GA                                                    |                                                          |                |         |
| TAMH6R                                             | TCC TTG GAG ACC CAG ACA AC                                                    | 390                                                      | 50             |         |
